# Supplementary material
Source: PubMed Central journal article supplement (PMC6951345)
Supplement: 41422_2019_246_MOESM2_ESM.pdf [file 41422_2019_246_MOESM2_ESM.pdf]

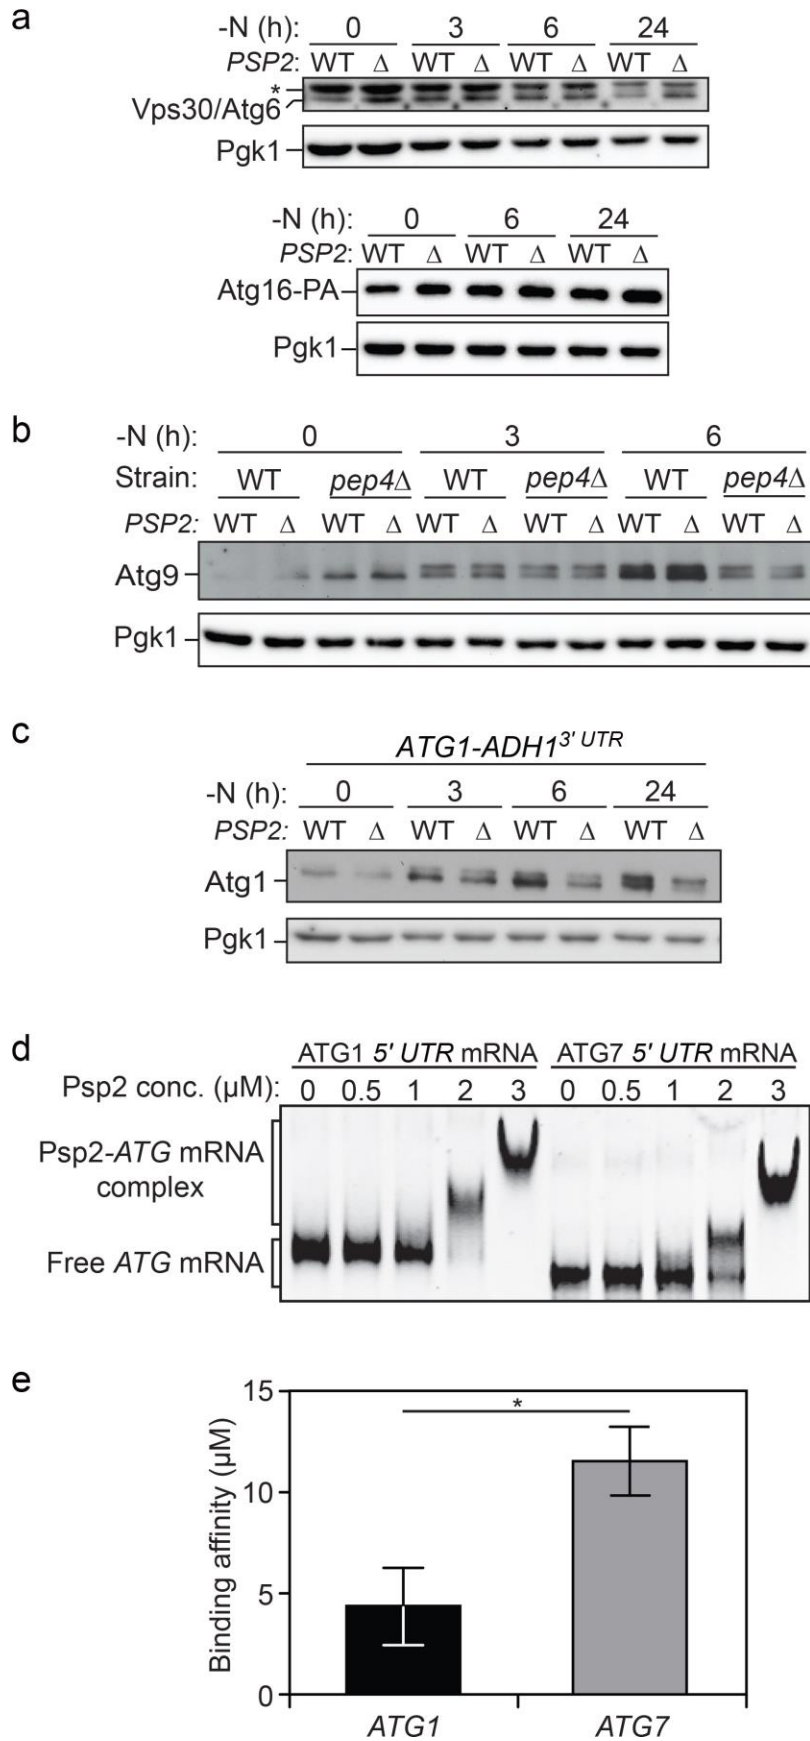

**Supplementary information, Fig. S2. Psp2 binds *ATG1* mRNA to regulate its expression.**

**a** Psp2 does not promote Vps30/Atg6 and Atg16 expression. WT (YZY241) and *psp2* $\Delta$  (YZY242) cells were grown in YPD medium until the mid-log phase and then starved for nitrogen for the indicated times. Protein extracts were analyzed by western blot with anti-Vps30/Atg6, anti-PA and anti-Pgk1 (loading control) antisera or antibodies. **b** Psp2 does not regulate Atg9 expression. WT and *psp2* $\Delta$  cells in both WT (SEY6210 and YZY050) and *pep4* $\Delta$  (TVY1 and YZY092) backgrounds were grown in YPD medium until the mid-log phase and then starved for nitrogen for the indicated times. Protein extracts were analyzed by western blot with anti-Atg9 and anti-Pgk1 (loading control) antisera. **c** The regulation of Atg1 translation by Psp2 is independent of the 3' UTR of *ATG1* mRNA. Atg1 protein levels were measured in WT (XLY324) and *psp2* $\Delta$  (XLY444) cells expressing *ATG1* with the *ADHI* 3' UTR under the indicated conditions by western blot. A representative image is shown. **d-e** Psp2 has stronger binding affinity to *ATG1* mRNA in comparison to *ATG7* mRNA. 500-bp constructs representing the 5' UTR transcripts of the *ATG1* or *ATG7* mRNAs were incubated with increasing concentrations of purified recombinant Psp2. A representative image is shown in (d). Titration gel-shift assay was performed to calculate the  $K_d$  of the binding, as shown in (e). Mean  $\pm$  SEM of  $n = 3$  independent experiments are indicated. Student's t-test; \* $p < 0.05$ .
