# Supplementary material
Source: PubMed Central journal article supplement (PMC6951345)
Supplement: 41422_2019_246_MOESM3_ESM.pdf [file 41422_2019_246_MOESM3_ESM.pdf]

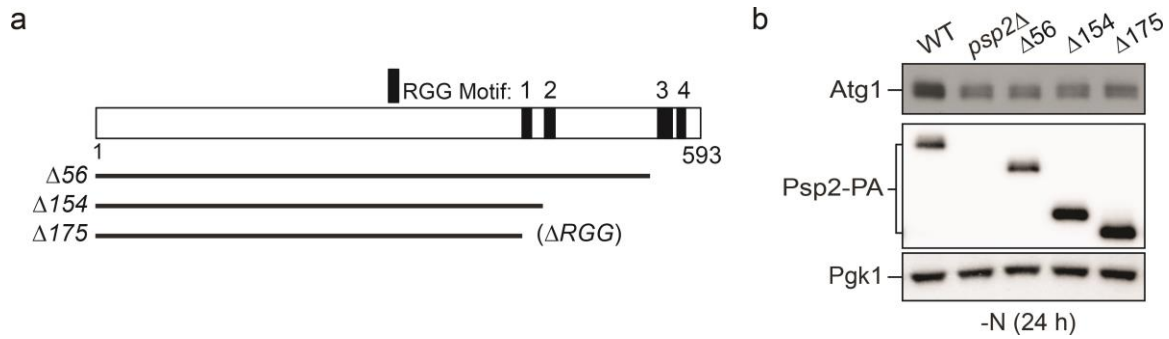

**Supplementary information, Fig. S3. The RGG motif is required for Psp2 to promote Atg1 translation.**

**a** The RGG motif in Psp2 is important in regulating Atg1 expression. The positions of the RGG motifs in Atg1 are indicated schematically. **b** The Atg1 protein level was measured in the indicated strains (WT [YZY051],  $psp2\Delta$  [YZY050], truncation mutants [YZY114, YZY115, YZY116]) after 1 d of nitrogen starvation as in Fig. 1a.
