# Supplementary material
Source: PubMed Central journal article supplement (PMC6951345)
Supplement: 41422_2019_246_MOESM4_ESM.pdf [file 41422_2019_246_MOESM4_ESM.pdf]

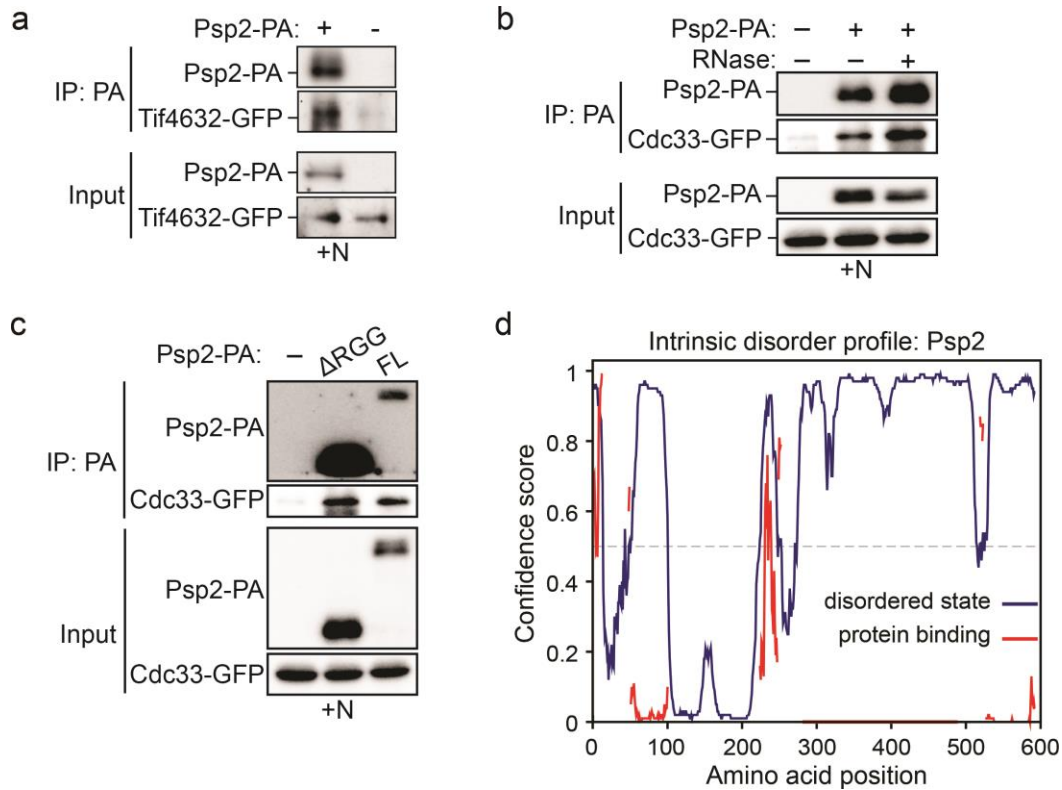

**Supplementary information, Fig. S4. Psp2 interacts with eIF4E-eIF4G2 during nitrogen starvation.**

**a** Psp2 interacts with eIF4G2. Cells expressing Psp2-PA and Tif4632-GFP (YZY143) or only Tif4632-GFP (YZY142) were grown in YPD medium until mid-log phase. Cell lysates were prepared and then subjected to protein-A-immunoprecipitation (IP: PA) as described in Experimental Procedures. The samples were analyzed by western blot with anti-PA and anti-GFP antibodies. **b** The interaction between Psp2 and eIF4E is RNA independent during growing conditions. Cells were grown in YPD medium until mid-log phase and then subjected to PA-IP with RNase A treatment as in Fig. 4b. **c** The RGG motif is not required for Psp2-eIF4E interaction during growing conditions. Cells were grown in YPD medium until mid-log phase and then subjected to PA-IP as described in panel a. **d** Predictions of intrinsic disordered regions and protein binding regions in Psp2.
