# Supplementary material
Source: PubMed Central journal article supplement (PMC6951345)
Supplement: 41422_2019_246_MOESM5_ESM.pdf [file 41422_2019_246_MOESM5_ESM.pdf]

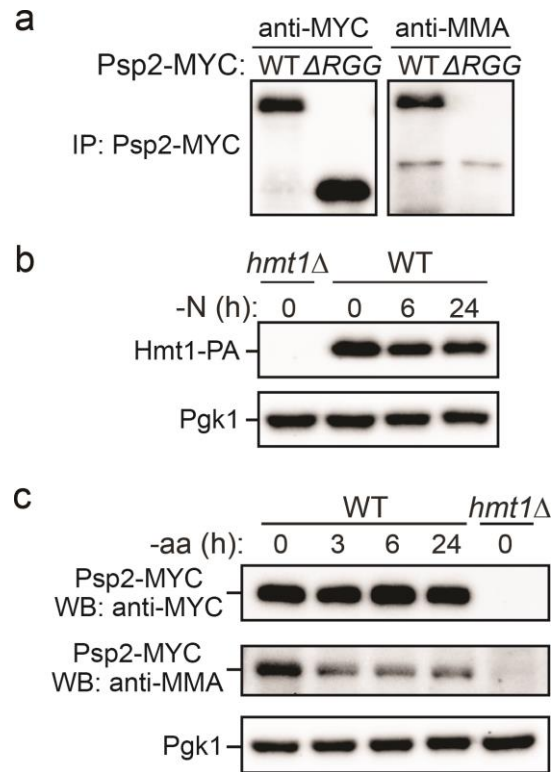

**Supplementary information, Fig. S5. Psp2 is arginine methylated in the context of the RGG motif by Hmt1.**

**a** Psp2 is methylated only in the context of the RGG motif. Psp2-MYC and Psp2 $\Delta$ RGG-MYC were affinity isolated with anti-MYC-beads from *PSP2-MYC* (YZY133) and *PSP2 $\Delta$ I75-MYC* (YZY271) cells. The samples were analyzed by western blot with anti-MYC and mono-methyl arginine (MMA)-specific antibody. **b** Hmt1 protein level slightly decreased after nitrogen starvation. *HMT1-PA* (YZY243) cells were grown in YPD medium until the mid-log phase and then starved for nitrogen for 6 h or 1 d. Protein extracts were analyzed by western blot with anti-MYC antiserum or anti-Pgk1 antibody (loading control). *hmt1* $\Delta$  (YZY149) cells collected during growing conditions (0 h -N) serve as a negative control. **c** The amount of methylated Psp2 markedly decreased upon amino acid starvation. *PSP2-MYC* cells were grown in YPD medium until the mid-log phase and then starved for

amino acids for the indicated times. *PSP2-MYC hmt1Δ* (YZY149) cells collected during growing conditions (0 h -N) serve as a negative control. Protein extracts were analyzed as described in Fig. 5c.
