# Supplementary material
Source: PubMed Central journal article supplement (PMC6951345)
Supplement: 41422_2019_246_MOESM6_ESM.pdf [file 41422_2019_246_MOESM6_ESM.pdf]

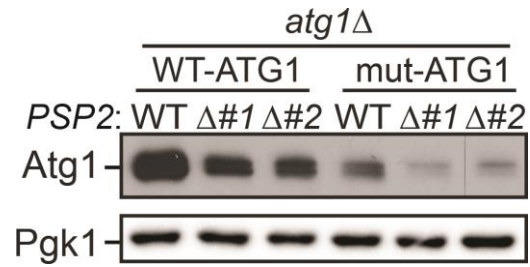

**Supplementary information, Fig. S6. Dhh1 and Psp2 regulate Atg1 synthesis independently.**

WT Atg1 (XLY316), WT Atg1 *psp2Δ* (YZY163), mutant Atg1 (XLY318), and mutant Atg1 *psp2Δ* (YZY164) cells were grown in YPD to mid-log phase and then shifted to SD-N for 1 d. The Atg1 level was analyzed by western blot as in Fig. 1a. The mutations (“mut”) were made in the structured regions of the *ATG1* ORF; #1 and #2 are independent isolates.
