# Supplementary material
Source: PubMed Central journal article supplement (PMC6951345)
Supplement: 41422_2019_246_MOESM7_ESM.pdf [file 41422_2019_246_MOESM7_ESM.pdf]

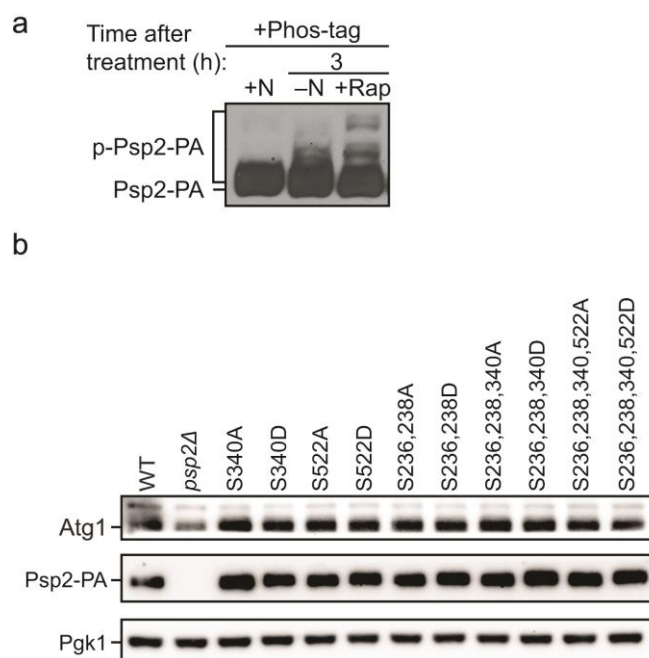

**Supplementary information, Fig. S7. The phosphorylation status of Psp2 does not affect its function in Atg1 translation.**

**a** Psp2 is hyperphosphorylated upon nitrogen starvation or rapamycin treatment. *PSP2-PA* cells (YZY051) were grown in YPD until mid-log phase and then starved for nitrogen or treated with 100 nM rapamycin for 3 h. Protein extracts were analyzed by western blot after SDS-PAGE using 50 mM Phos-tag. **b** Cells expressing the phosphomimetic (*PSP2<sup>S340D</sup>* [YZY090], *PSP2<sup>S522D</sup>* [YZY145], *PSP2<sup>S236,238D</sup>* [YZY147], *PSP2<sup>S236,238,340D</sup>* [YZY173], *PSP2<sup>S236,238,340,522D</sup>* [YZY196]) and non-phosphorylatable (*PSP2<sup>S340A</sup>* [YZY089], *PSP2<sup>S522A</sup>* [YZY144], *PSP2<sup>S236,238A</sup>* [YZY146], *PSP2<sup>S236,238,340A</sup>* [YZY172], *PSP2<sup>S236,238,340,522A</sup>* [YZY195]) mutants of Psp2 showed a similar level of Atg1 to WT (SEY6210) during nitrogen starvation. The Atg1 level was analyzed using western blot in the indicated strains after 1 d of nitrogen starvation as described in Fig. 1a.
