# Supplementary material
Source: PubMed Central journal article supplement (PMC6951345)
Supplement: 41422_2019_246_MOESM8_ESM.pdf [file 41422_2019_246_MOESM8_ESM.pdf]

**Table S1. Yeast strains used in this study.**

| <b>Name</b> | <b>Genotype</b>                                                                                                                       | <b>Reference</b> |
|-------------|---------------------------------------------------------------------------------------------------------------------------------------|------------------|
| JMY322      | WLY176 <i>ATG2-PA ATG7-PA ATG29-PA</i>                                                                                                | This study       |
| SEY6210     | MAT $\alpha$ <i>leu2-3,112 ura3-52 his3-<math>\Delta</math>200 trp1-<math>\Delta</math>901 suc2-<math>\Delta</math>9 lys2-801 GAL</i> | <sup>1</sup>     |
| TVY1        | SEY6210 <i>pep4<math>\Delta</math>::LEU2</i>                                                                                          | <sup>2</sup>     |
| WLY176      | SEY6210 <i>pho13<math>\Delta</math> pho8::pho8<math>\Delta</math>60</i>                                                               | <sup>3</sup>     |
| XLY306      | BY4742 <i>PGII-GFP::HIS3</i>                                                                                                          | This study       |
| XLY307      | BY4742 <i>PGII-GFP::HIS3 atg1<math>\Delta</math>::URA3</i>                                                                            | This study       |
| XLY316      | SEY6210 <i>atg1<math>\Delta</math>::HIS3 pRS406-ATG1::URA3</i>                                                                        | <sup>4</sup>     |
| XLY318      | SEY6210 <i>atg1<math>\Delta</math>::HIS3 pRS406-ATG1(mutant)::URA3</i>                                                                | <sup>4</sup>     |
| XLY324      | SEY6210 <i>ATG1-ADHI 3' UTR::TRP1</i>                                                                                                 | This study       |
| XLY349      | SEY6210 <i>atg1<math>\Delta</math>::HIS3 pRS406-ATG1-ATG7 3' UTR::URA3</i>                                                            | This study       |
| XLY439      | SEY6210 <i>KANMX6::ZEO1p-PSP2-PA::TRP1</i>                                                                                            | This study       |
| XLY440      | XLY306 <i>psp2<math>\Delta</math>::KANMX6</i>                                                                                         | This study       |
| XLY441      | XLY349 <i>psp2<math>\Delta</math>::KANMX6</i>                                                                                         | This study       |
| XLY442      | SEY6210 <i>atg1<math>\Delta</math>::HIS3 pRS406-ATG7p-ATG1::URA3</i>                                                                  | This study       |
| XLY443      | XLY442 <i>psp2<math>\Delta</math>::KANMX6</i>                                                                                         | This study       |
| XLY444      | XLY324 <i>psp2<math>\Delta</math>::KANMX6</i>                                                                                         | This study       |
| YKF527      | WLY176 <i>atg9<math>\Delta</math>::LEU2</i>                                                                                           | This study       |
| YZY050      | SEY6210 <i>psp2<math>\Delta</math>::KANMX6</i>                                                                                        | This study       |
| YZY051      | SEY6210 <i>PSP2-PA::KANMX6</i>                                                                                                        | This study       |
| YZY059      | SEY6210 <i>ATG14-PA::TRP1</i>                                                                                                         | This study       |
| YZY060      | YZY050 <i>ATG14-PA::TRP1</i>                                                                                                          | This study       |
| YZY063      | WLY176 <i>psp2<math>\Delta</math>::HIS3</i>                                                                                           | This study       |
| YZY089      | SEY6210 <i>PSP2<sup>S340A</sup>-PA::KANMX6</i>                                                                                        | This study       |
| YZY090      | SEY6210 <i>PSP2<sup>S340D</sup>-PA::KANMX6</i>                                                                                        | This study       |
| YZY092      | TVY1 <i>psp2<math>\Delta</math>::KANMX6</i>                                                                                           | This study       |
| YZY114      | SEY6210 <i>PSP2<math>\Delta</math>C56-PA::HIS3</i>                                                                                    | This study       |
| YZY115      | SEY6210 <i>PSP2<math>\Delta</math>C154-PA::HIS3</i>                                                                                   | This study       |
| YZY116      | SEY6210 <i>PSP2<math>\Delta</math>C175-PA::HIS3</i>                                                                                   | This study       |
| YZY128      | JMY322 <i>psp2<math>\Delta</math>::KANMX6</i>                                                                                         | This study       |
| YZY131      | YZY051 <i>CDC33-GFP::HIS3</i>                                                                                                         | This study       |
| YZY132      | SEY6210 <i>CDC33-GFP::HIS3</i>                                                                                                        | This study       |
| YZY133      | SEY6210 <i>PSP2-MYC::KANMX6</i>                                                                                                       | This study       |
| YZY139      | YZY132 <i>PSP2(<math>\Delta</math>175)-PA::KANMX6</i>                                                                                 | This study       |
| YZY142      | SEY6210 <i>TIF4632-GFP::TRP1</i>                                                                                                      | This study       |
| YZY143      | YZY051 <i>TIF4632-GFP::TRP1</i>                                                                                                       | This study       |
| YZY144      | SEY6210 <i>PSP2<sup>S522A</sup>-PA::KANMX6</i>                                                                                        | This study       |
| YZY145      | SEY6210 <i>PSP2<sup>S522D</sup>-PA::KANMX6</i>                                                                                        | This study       |
| YZY146      | SEY6210 <i>PSP2<sup>SS236,238AA</sup>-PA::KANMX6</i>                                                                                  | This study       |
| YZY147      | SEY6210 <i>PSP2<sup>SS236,238DD</sup>-PA::KANMX6</i>                                                                                  | This study       |
| YZY149      | YZY133 <i>hmt1<math>\Delta</math>::HIS3</i>                                                                                           | This study       |

|        |                                                                    |            |
|--------|--------------------------------------------------------------------|------------|
| YZY163 | XLY316 <i>psp2Δ::KANMX6</i>                                        | This study |
| YZY164 | XLY318 <i>psp2Δ::KANMX6</i>                                        | This study |
| YZY167 | SEY6210 <i>PSP2(Δ419-427)-PA::TRP1</i>                             | This study |
| YZY168 | SEY6210 <i>PSP2(Δ453-475)-PA::TRP1</i>                             | This study |
| YZY169 | SEY6210 <i>PSP2(Δ551-564)-PA::TRP1</i>                             | This study |
| YZY170 | SEY6210 <i>PSP2(Δ569-576)-PA::TRP1</i>                             | This study |
| YZY171 | SEY6210 <i>PSP2(Δ440-449)-PA::TRP1</i>                             | This study |
| YZY172 | SEY6210 <i>PSP2<sup>S236,238,340A</sup>-PA::TRP1</i>               | This study |
| YZY173 | SEY6210 <i>PSP2<sup>S236,238,340D</sup>-PA::TRP1</i>               | This study |
| YZY177 | YZY051 <i>hmt1Δ::HIS3</i>                                          | This study |
| YZY184 | XLY349 <i>PSP2-PA::KANMX6</i>                                      | This study |
| YZY185 | XLY442 <i>PSP2-PA::KANMX6</i>                                      | This study |
| YZY195 | SEY6210 <i>PSP2<sup>S236,238,340,522A</sup>::KANMX6</i>            | This study |
| YZY196 | SEY6210 <i>PSP2<sup>S236,238,340,522D</sup>-PA::KANMX6</i>         | This study |
| YZY205 | TVY1 <i>PSP2-PA::KANMX6</i>                                        | This study |
| YZY211 | SEY6210 <i>PGII-GFP::TRP1</i>                                      | This study |
| YZY212 | YZY211 <i>psp2Δ::KANMX6</i>                                        | This study |
| YZY213 | YZY212 <i>pRS406-PSP2-PA::URA3</i>                                 | This study |
| YZY215 | YZY050 <i>pRS406-PSP2<sup>R551,553A</sup>-PA::URA3</i>             | This study |
| YZY216 | YZY050 <i>pRS406-PSP2<sup>R557,559,563A</sup>-PA::URA3</i>         | This study |
| YZY217 | YZY212 <i>pRS406-PSP2<sup>R551,553,557,559,563A</sup>-PA::URA3</i> | This study |
| YZY218 | YZY050 <i>pRS406-PSP2<sup>R440,443,447A</sup>-PA::URA3</i>         | This study |
| YZY225 | YZY205 <i>HIS3::ZEO1p-PSP2</i>                                     | This study |
| YZY231 | SEY6210 <i>ATG13-PA</i>                                            | This study |
| YZY232 | YZY231 <i>psp2Δ::KANMX6</i>                                        | This study |
| YZY235 | ZYY202 <i>psp2Δ::KANMX6</i>                                        | This study |
| YZY236 | ZYY202 <i>HIS3::ZEO1p-PSP2</i>                                     | This study |
| YZY241 | SEY6210 <i>ATG16-PA::TRP1</i>                                      | This study |
| YZY242 | YZY050 <i>ATG16-PA::TRP1</i>                                       | This study |
| YZY243 | SEY6210 <i>HMT1-PA::KANMX6</i>                                     | This study |
| YZY248 | YZY050 <i>pRS406-PSP2<sup>R551,553,557,559,563K</sup>-PA::URA3</i> | This study |
| YZY249 | YZY050 <i>pRS406-PSP2<sup>R551,553,557,559,563F</sup>-PA::URA3</i> | This study |
| YZY252 | YZY212 <i>pRS406-PSP2<sup>R551,553,557,559,563K</sup>-PA::URA3</i> | This study |
| YZY253 | YZY212 <i>pRS406-PSP2<sup>R551,553,557,559,563F</sup>-PA::URA3</i> | This study |
| YZY271 | SEY6210 <i>PSP2Δ175-MYC::KANMX6</i>                                | This study |
| YZY276 | YZY132 <i>psp2Δ::KANMX6</i>                                        | This study |
| YZY277 | YZY276 <i>pRS406-PSP2-PA::URA3</i>                                 | This study |
| YZY278 | YZY276 <i>pRS406-PSP2(Δ2-51)-PA::URA3</i>                          | This study |
| YZY279 | YZY276 <i>pRS406-PSP2(Δ51-100)-PA::URA3</i>                        | This study |
| YZY280 | YZY276 <i>pRS406-PSP2(Δ224-252)-PA::URA3</i>                       | This study |
| YZY281 | YZY276 <i>pRS406-PSP2(Δ274-322)-PA::URA3</i>                       | This study |
| YZY282 | YZY276 <i>pRS406-PSP2(Δ323-418)-PA::URA3</i>                       | This study |
| YZY283 | SEY6210 <i>PGK1-GFP::HIS3</i>                                      | This study |
| YZY284 | YZY050 <i>PGK1-GFP::HIS3</i>                                       | This study |
| YZY285 | SEY6210 <i>atg1Δ::KANMX6 PGK1-GFP::HIS3</i>                        | This study |

|        |                                             |              |
|--------|---------------------------------------------|--------------|
| YZY286 | SEY6210 <i>FBA1-GFP::HIS3</i>               | This study   |
| YZY287 | YZY050 <i>FBA1-GFP::HIS3</i>                | This study   |
| YZY288 | SEY6210 <i>atg1Δ::KANMX6 FBA1-GFP::HIS3</i> | This study   |
| ZYY202 | JMY114 <i>pRS406-ATG13-PA::URA3</i>         | <sup>4</sup> |

### Supplemental References

- 1 Robinson, J. S., Klionsky, D. J., Banta, L. M. & Emr, S. D. Protein sorting in *Saccharomyces cerevisiae*: isolation of mutants defective in the delivery and processing of multiple vacuolar hydrolases. *Mol Cell Biol* **8**, 4936-4948 (1988).
- 2 Wurmser, A. E. & Emr, S. D. Phosphoinositide signaling and turnover: PtdIns(3)P, a regulator of membrane traffic, is transported to the vacuole and degraded by a process that requires luminal vacuolar hydrolase activities. *EMBO J* **17**, 4930-4942, doi:10.1093/emboj/17.17.4930 (1998).
- 3 Mao, K. *et al.* Atg29 phosphorylation regulates coordination of the Atg17-Atg31-Atg29 complex with the Atg11 scaffold during autophagy initiation. *Proceedings of the National Academy of Sciences of the United States of America* **110**, E2875-2884, doi:10.1073/pnas.1300064110 (2013).
- 4 Liu, X. *et al.* Dhh1 promotes autophagy-related protein translation during nitrogen starvation. *PLoS Biol* **17**, e3000219, doi:10.1371/journal.pbio.3000219 (2019).
