# Supplementary material
Source: PubMed Central journal article supplement (PMC6951345)
Supplement: 41422_2019_246_MOESM9_ESM.pdf [file 41422_2019_246_MOESM9_ESM.pdf]

**Table S2. RT-qPCR primers used in this study.**

| <b>Primer</b> | <b>Sequence</b>             |
|---------------|-----------------------------|
| ATG1 F        | ATCTAAGATGGCCGCACATATG      |
| ATG1 R        | AGGGTAGTCACCATAGGCATTC      |
| PGK1 F        | GAAGGACAAGCGTGTCTTCATCAG    |
| PGK1 R        | CGTACTTGATGGTTGGCAAAGCAG    |
| ATG1 -480 F   | TTAACCGCTCGGCTCTGATTTC      |
| ATG1 -480 R   | AAGCTCCTTTATGAGATGCTCGATTTC |
| ATG1 -290 F   | TAGGCCGAGGTTAATTCTAGAACG    |
| ATG1 -290 R   | ATAGTACTGTTCTCTGTTTCCCCAGA  |
| ATG1 35 F     | CTGTGAACCATAATCTAATGGCAAGTG |
| ATG1 35 R     | TACTTCCTTTATGGCTACATGCTGAG  |
| ATG1 800 F    | GAGCTTCCAATCATTTGGAGTTATTC  |
| ATG1 800 R    | CTATTCTTTGGGCTGGATCAAATGTC  |
| ATG1 2340 F   | GGTAGTTCGGAAGAGCCAGTATAT    |
| ATG1 2340 R   | GTTGCATAAGCTAATTCACAGTTGTAC |
| ATG1 3' UTR F | GAGGCAGAAGATGAACCACCAA      |
| ATG1 3' UTR R | GTAAAGCATTTTCGAGAGTAGCATAAC |
| ATG2 -11F     | GATTTTCGATACAATGGCATTTTG    |
| ATG2 -11R     | ACCCTATAGAAACGTCCAAGTTAG    |
| ATG3 +1 F     | CATGATTAGATCTACACTAAGTAG    |
| ATG3 +1 R     | CTTGTACAAACTCCTCAGGAG       |
| ATG4 -10 F    | AGGAGTGATATACATGCAGAGGTG    |
| ATG4 -10 R    | TGATTCATAAGAGCAGCCGGTTC     |
| ATG5 -30 F    | GAACGGAGATAGGAAACCTATG      |
| ATG5 -30 R    | CATCAAAAATGAAGGATCGATC      |
| ATG7 +3 F     | GTCGTCAGAAAGGGTCTTAAG       |
| ATG7 +3 R     | GAATCTAATTTCAGAACATCGAG     |
| ATG8 -10 F    | AATTACTAGAGACATGAAGTCTAC    |
| ATG8 -10 R    | TCGCAAATCACAGGTATCCTATTC    |
| ATG9 -39F     | GAACAGCCTGAAATATCAAATCAC    |
| ATG9 -39R     | GAAGGATTAACCTTCATCCGATTG    |
| ATG10 -7F     | CAGACTTGATGATTCTTACCAG      |
| ATG10 -7R     | GAAGTCCATCCTTTTCATCATTTC    |
| ATG11 -5 F    | CATCATGGCAGACGCTGATG        |
| ATG11 -5 R    | GCATTTATGATAGTGGCTGTTG      |
| ATG12 -25F    | CTACAGTAGAGTGAACCAATGAC     |
| ATG12 -25R    | TGGATCTTTCCATTGCCGTTTC      |
| ATG13 -10 F   | AGCATGAGTCATGGTTGCCGAAG     |
| ATG13 -10 R   | ACTTGATTCCGGTGGAGCATATTAG   |
| ATG14 -10 F   | GAATCCTAGTATGACATGCATTG     |
| ATG14 -10 R   | CTAGTTTTAGCTTCAGTAGCAG      |
| ATG17 -10 F   | CACCTATGAACGAAGCAGATG       |
| ATG17 -10 R   | CTACAATCCTTAAATTAGCACTTG    |

|             |                         |
|-------------|-------------------------|
| ATG18 -20F  | TCCTTTTCTTCTTCGGCCTG    |
| ATG18 -20R  | GAAACCTTTCGACGTTCCAAG   |
| ATG19 -10 F | GAGTTCTGGTAAATGAACAATC  |
| ATG19 -10 R | TCTAAAGTTGGCACAATTAGTTG |
| ATG23 -10F  | GTGAAGAAGTAAATATGGAAGT  |
| ATG23 -10R  | GAAGCCGAATTTACATCAGAC   |
| ATG29 -10 F | CCTACTTGACTTTCATGATTATG |
| ATG29 -10 R | CATTCCACTCAAATTTGGGAG   |
| ATG31 -35F  | TAAGCCGGTAAACATTGCTG    |
| ATG31 -35R  | TTGATCATCGTTGCTGGGAC    |
| VPS15 -10F  | CATACAGTATAATGGGGGCAC   |
| VPS15 -10R  | ACTGTGAAACGTAGTGTACTTC  |
| VPS34 -30F  | GCATTGAGGGAAGGGTTAAC    |
| VPS34 -30R  | GTGGCTTATGTCCTTCCAATG   |
